# Supplementary material for: Ligand-specific conformational transitions and intracellular transport are required for atypical chemokine receptor 3–mediated chemokine scavenging
Source: PubMed Central journal article supplement (PMC5777261; doi:10.1074/jbc.m117.814947), 2017-11-27

**Supplemental Figure S1 shows arrestin relocation at different time points after stimulation with 100nM of CXCL12 or CXCL11, as indicated.**

Methods as indicated in the methods section.

# Supplemental Figure S1

## A. WT ACKR3

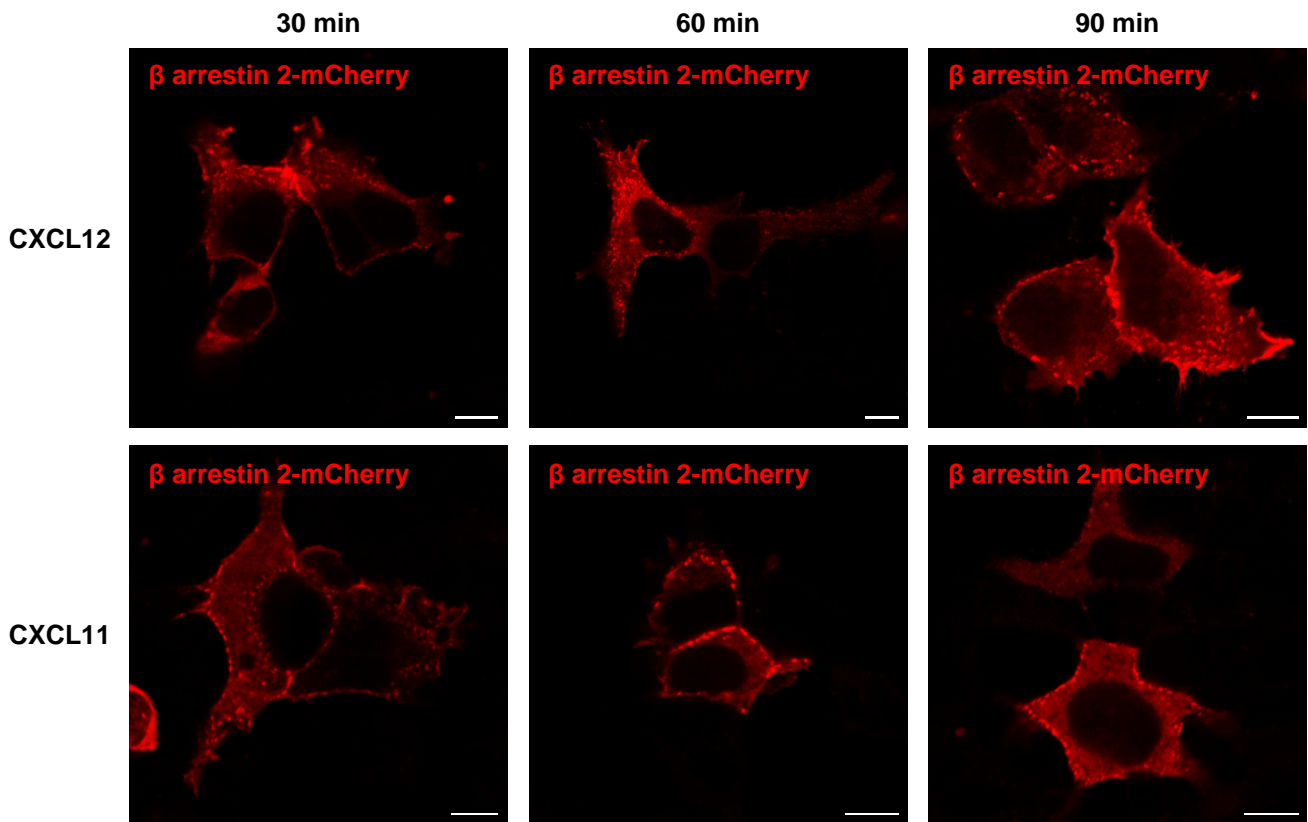

## B. R142A

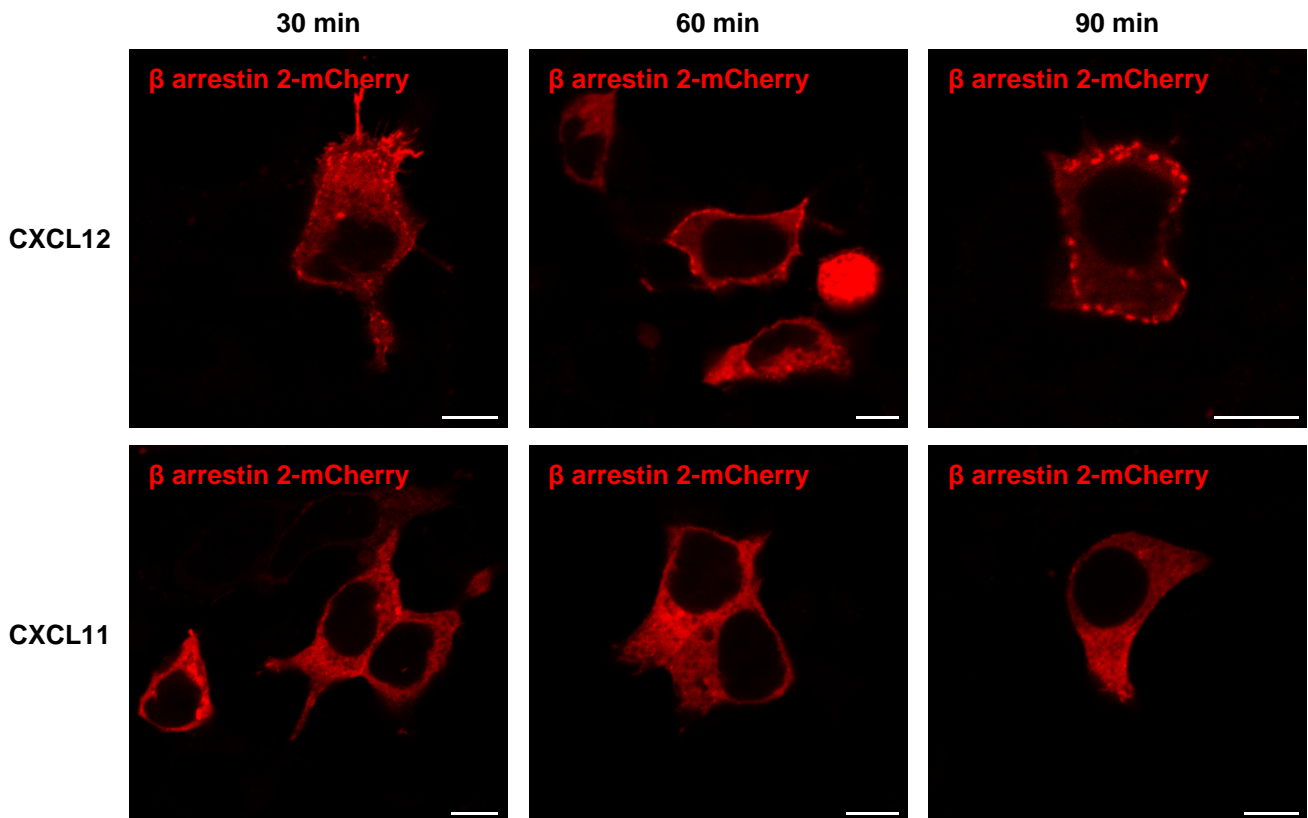

Supplement: 10.1074_M117.814947_jbc.M117.814947-1.pdf [file 10.1074_M117.814947_jbc.M117.814947-1.pdf]
